# Supplementary material for: Therapeutic approach with commercial supplements for pantothenate kinase-associated neurodegeneration with residual PANK2 expression levels.
Source: Research Square preprint supplement (doi:10.21203/rs.3.rs-1629815/v1), 2022-05-10
Supplement: Supplementary file 1 [file 900ddd1067dadf9b48626d33.docx]

Supplementary Material

## Supplementary Figures


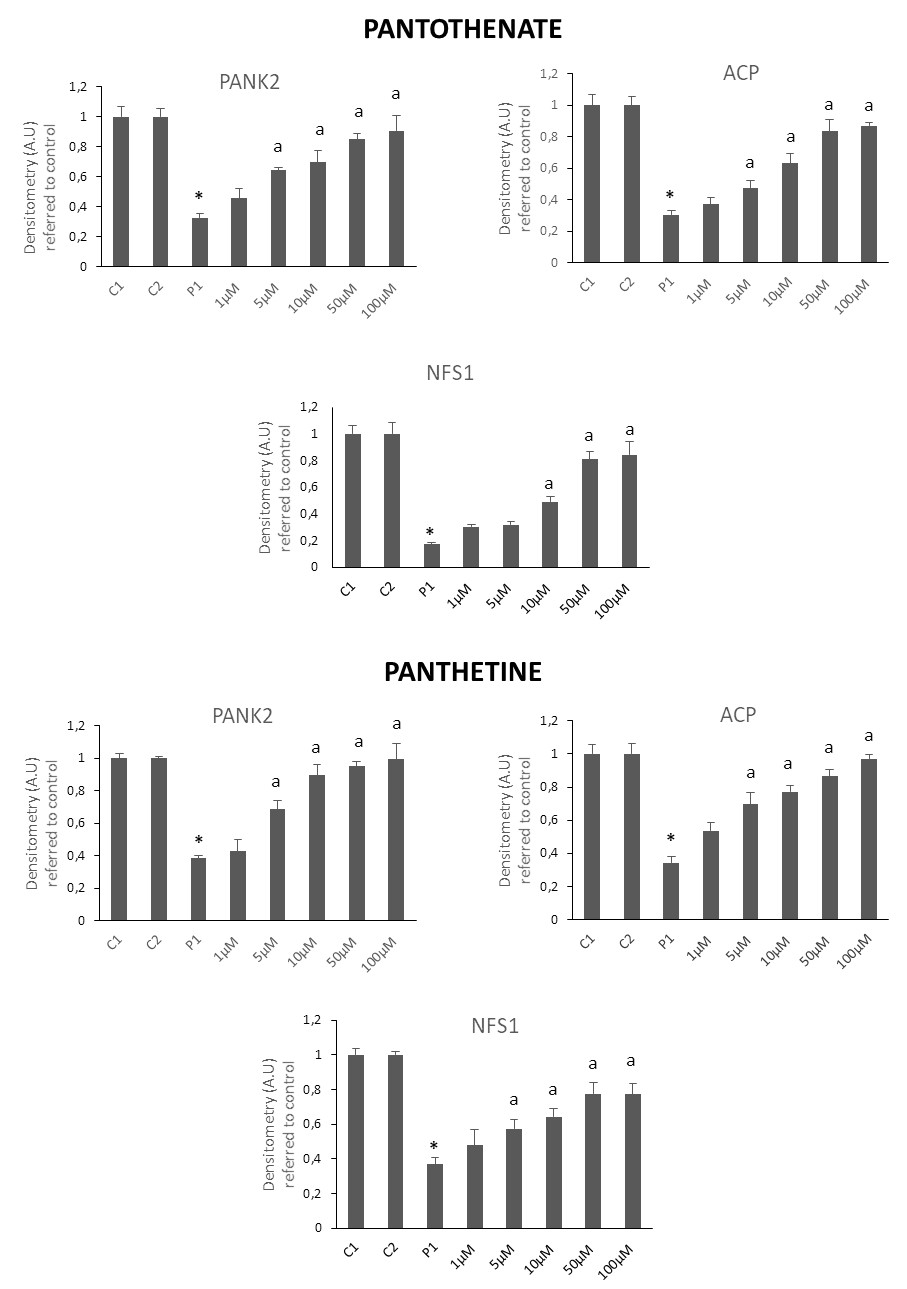


**Supplementary Figure 1.**

Densitometry Westerns Figure **3**. Data represent the mean±SD of three separate experiments. *p<0.01 between PKAN patients and controls. ap<0.01 between untreated and treated fibroblasts. A.U., arbitrary units.

**
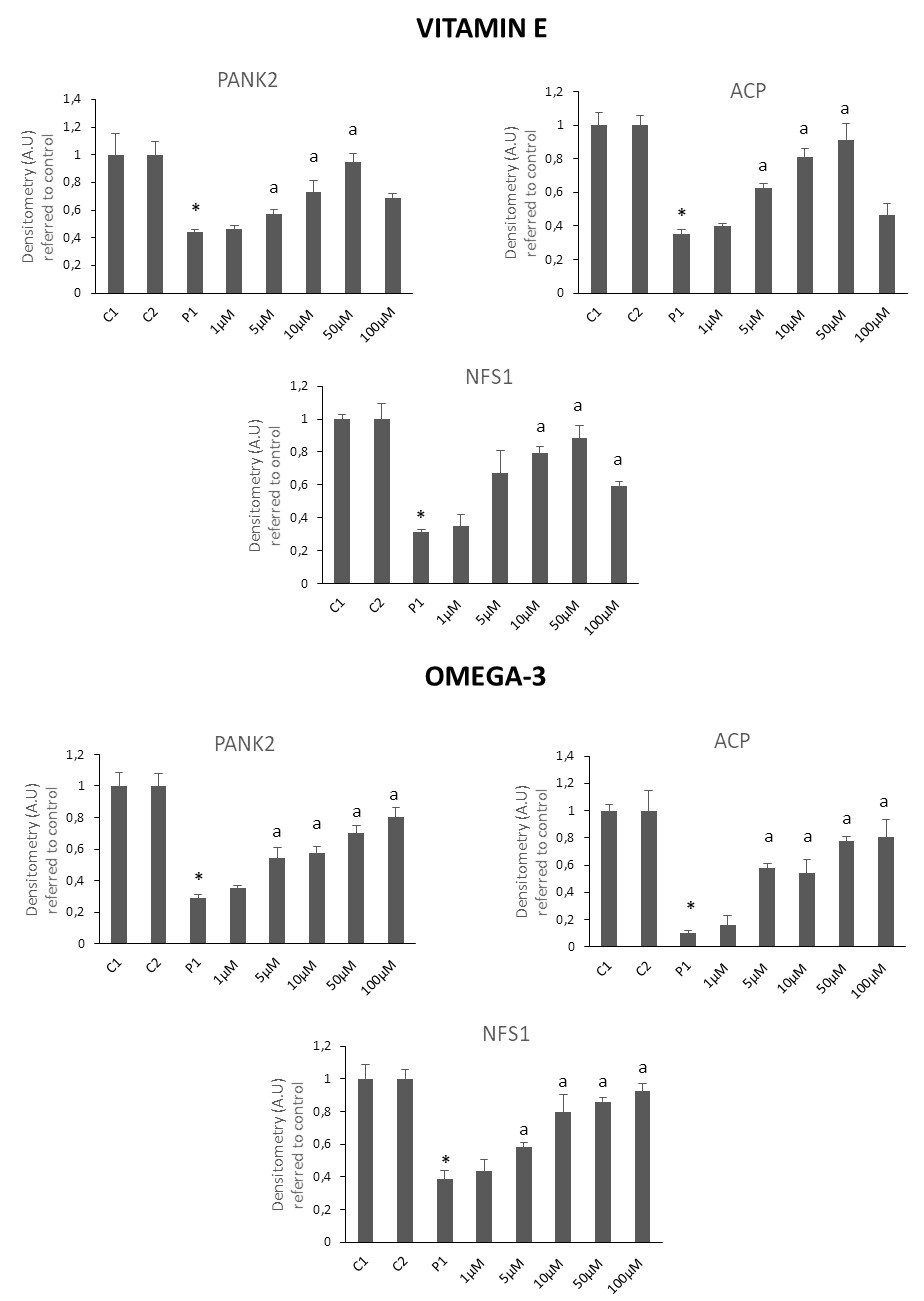
**

**Supplementary Figure 2.**

Densitometry Westerns Figure **4**. Data represent the mean±SD of three separate experiments. *p<0.01 between PKAN patients and controls. ap<0.01 between untreated and treated fibroblasts. A.U., arbitrary units.


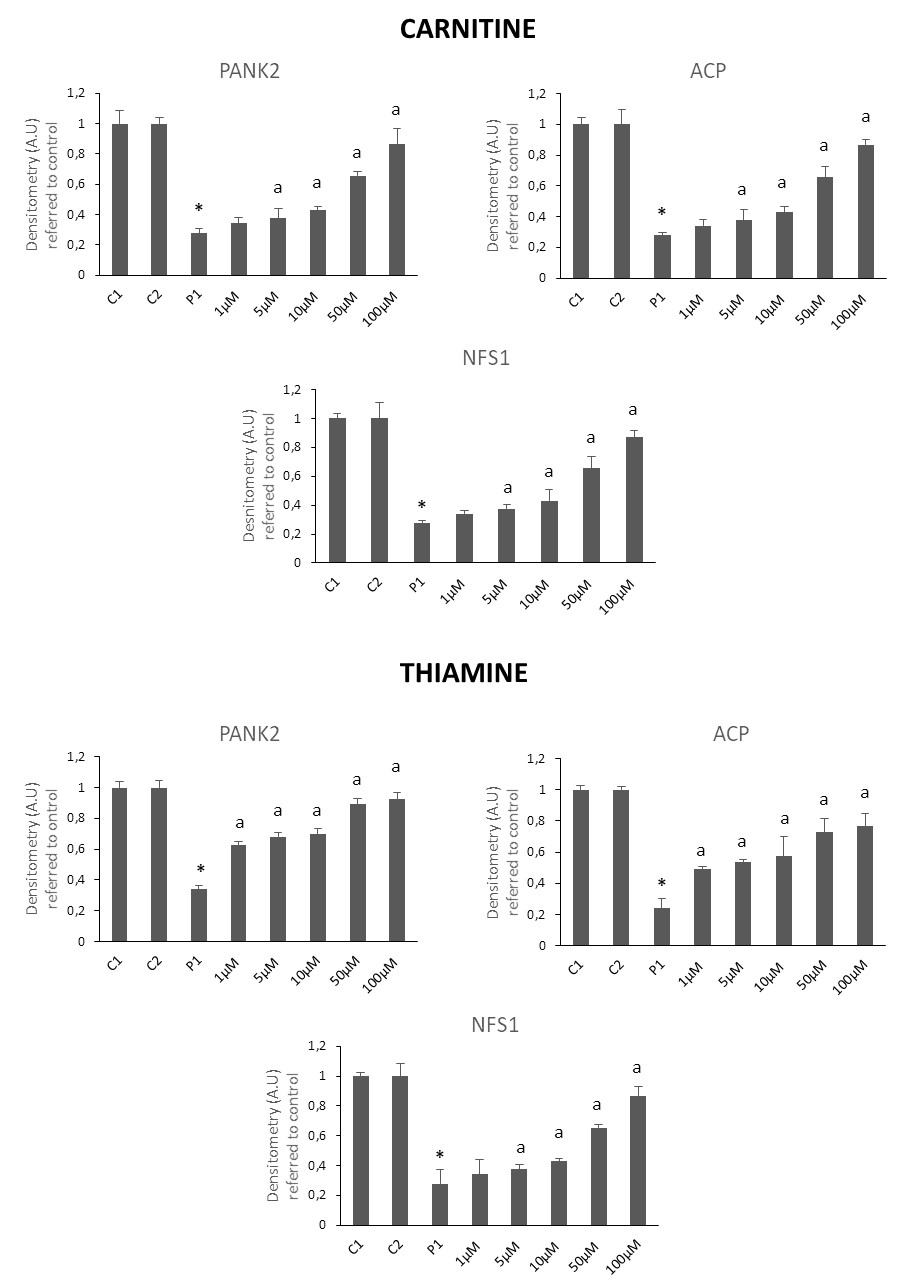


**Supplementary Figure 3.**

Densitometry Westerns Figure **5**. Data represent the mean±SD of three separate experiments. *p<0.01 between PKAN patients and controls. ap<0.01 between untreated and treated fibroblasts. A.U., arbitrary units.

**
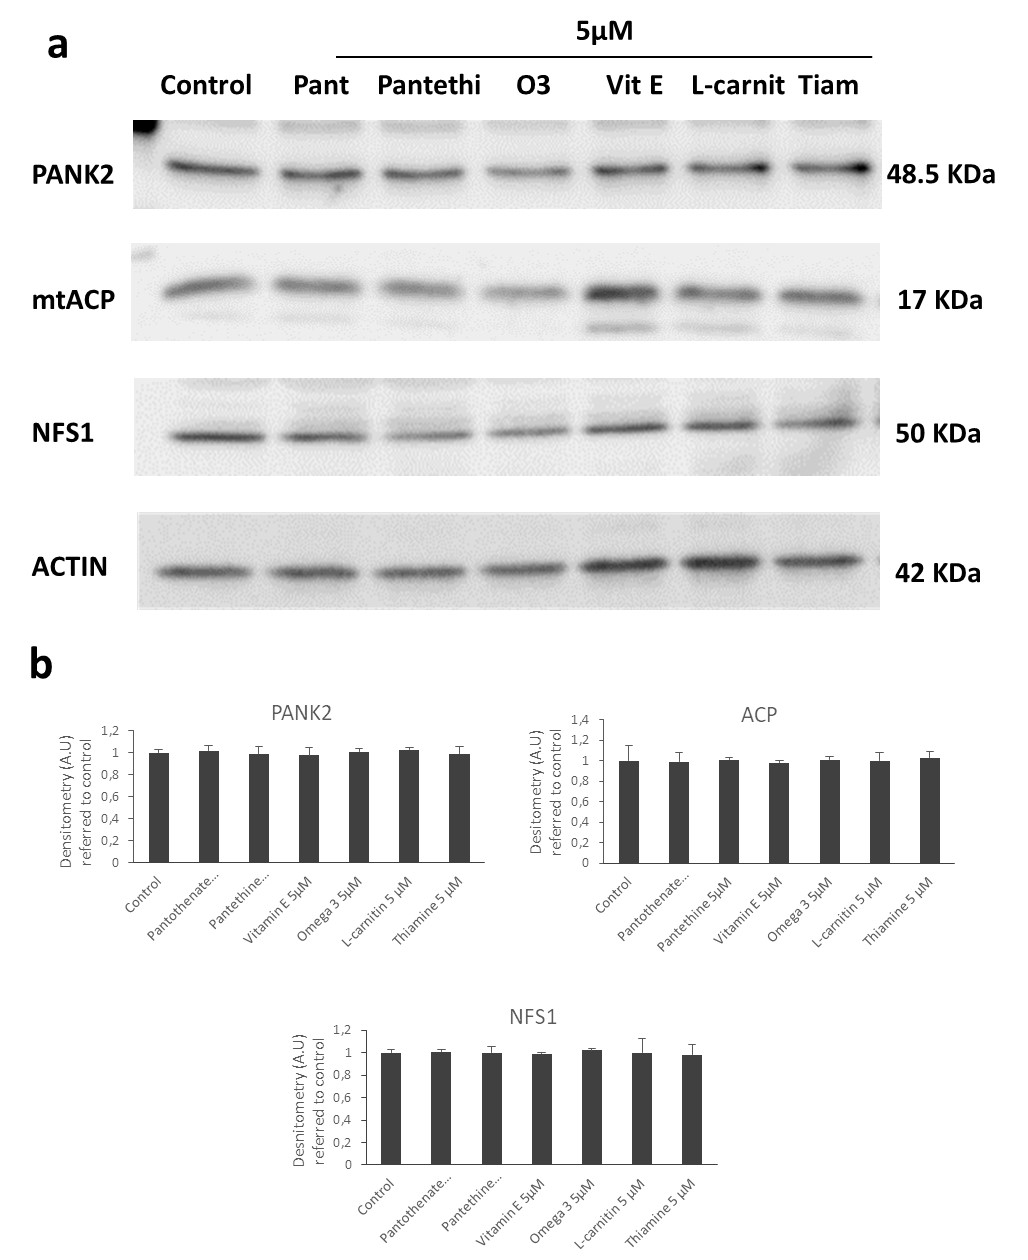
**

**Supplementary Figure 4.**

(**a**) Control cells were treated with pantothenate (Pant), pantethine (Pantethi), vitamin E (Vit E), omega 3 (O3), L-carnitine (L-carnit) or thiamine (Tiam) at 5 M for 20 days. Protein extracts (50 μg) were separated on a SDS polyacrylamide gel and immunostained with antibodies against PANK2, mtACP and NFS1. Actin was used as a loading control. (**b**). Densitometry of the Western blotting of PANK2. Data represent the mean±SD of three separate experiments. *p<0.01 between PKAN patients and controls. ap<0.01 between untreated and treated fibroblasts. A.U., arbitrary units.


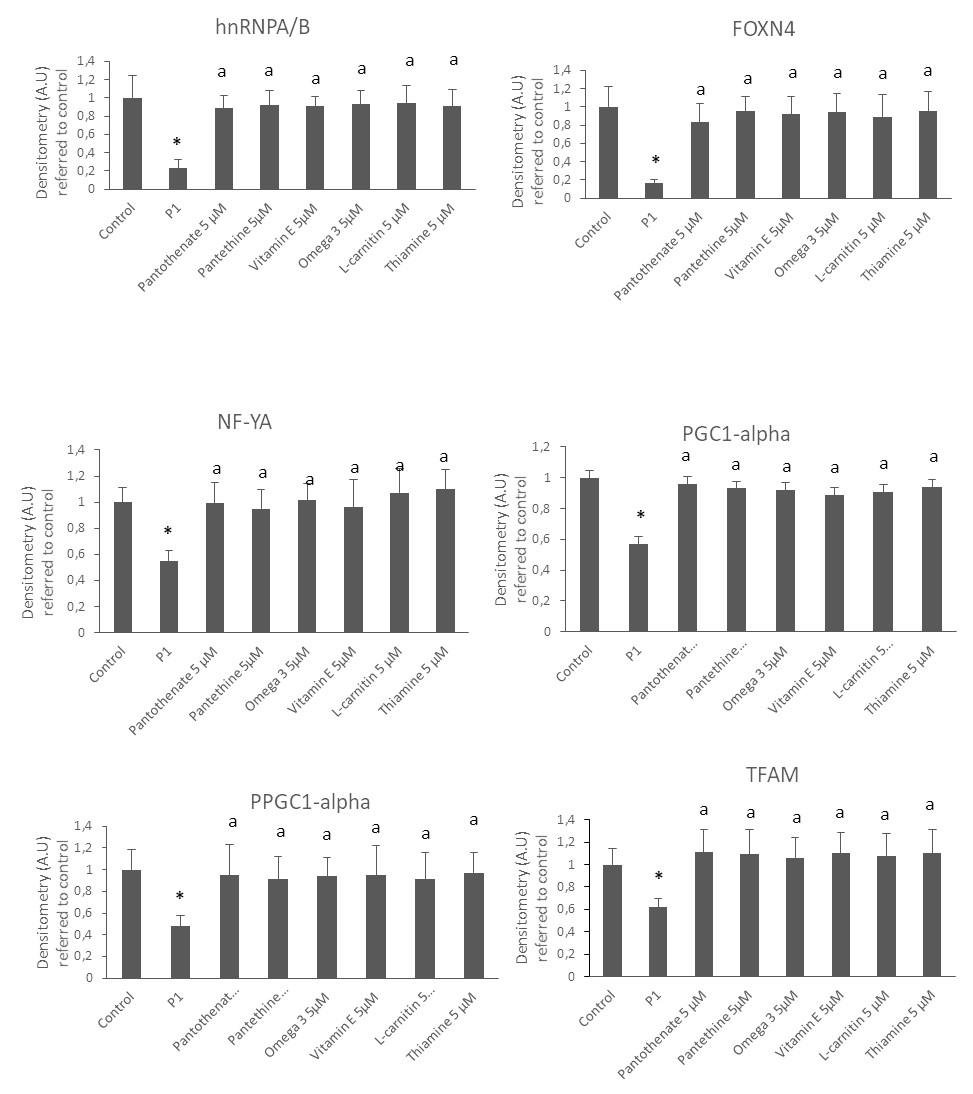


**Supplementary Figure 5.** Densitometry Westerns Figure **6b**. Data represent the mean±SD of three separate experiments. *p<0.01 between PKAN patients and controls. ap<0.01 between untreated and treated fibroblasts. A.U., arbitrary units.

**
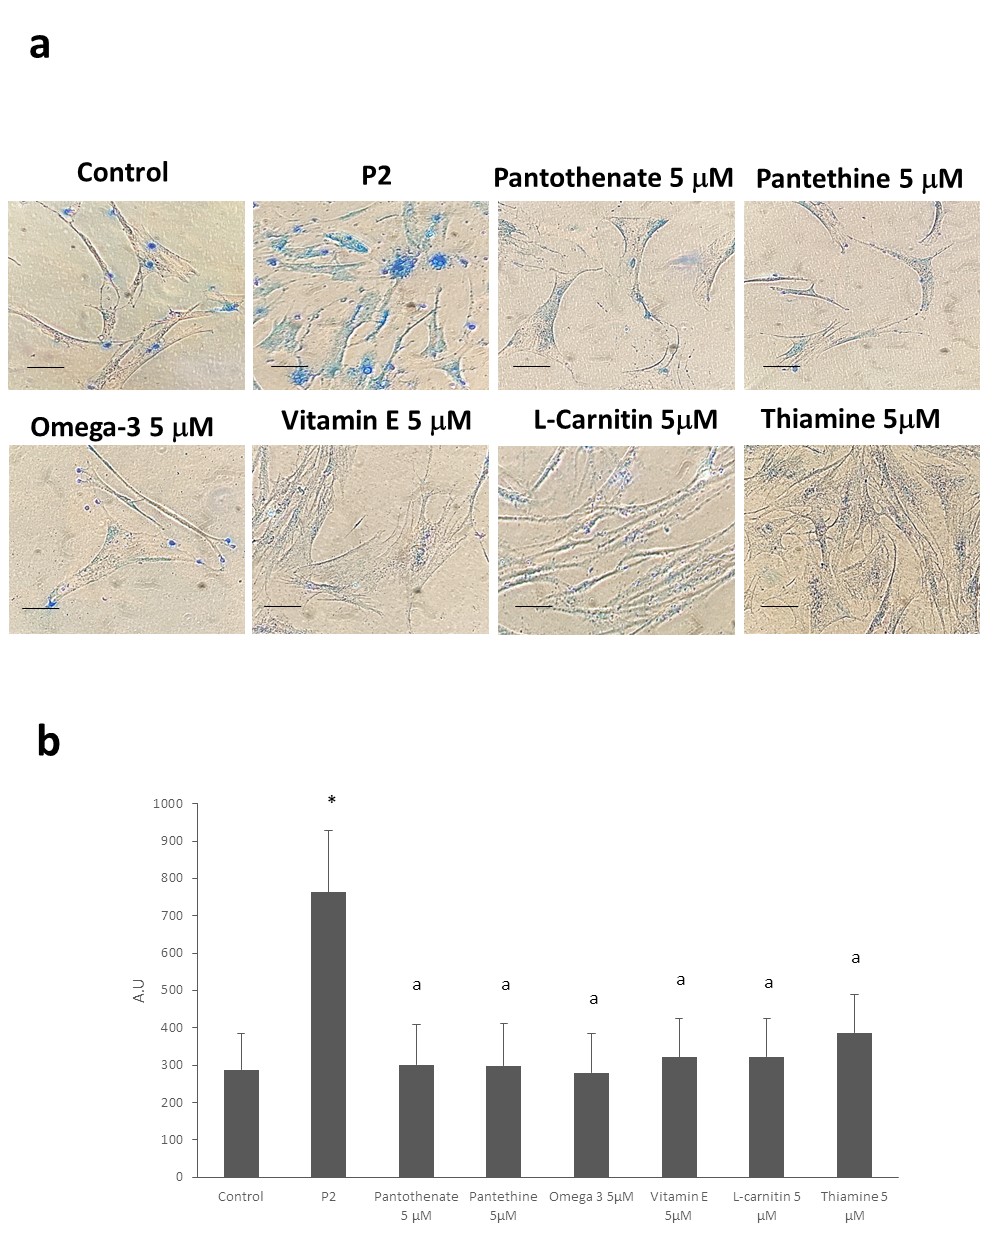
**

**Supplementary Figure 6.** (**a**) Control (C1) and PKAN fibroblasts (P2) were treated with pantothenate, pantethine, vitamin E, omega 3, L-carnitine or thiamine at 5 M for 20 days. Then, cells were stained with Prussian Blue as described in material and Methods and examined by bright-field microscopy. Scale bar= 15m. (**b**) Quantification of Prussian Blue staining. Images were analyzed by the Image J software. *p<0.01 between Control and PKAN fibroblasts. ap<0.01 between untreated and treated fibroblasts. A.U., arbitrary units.

**
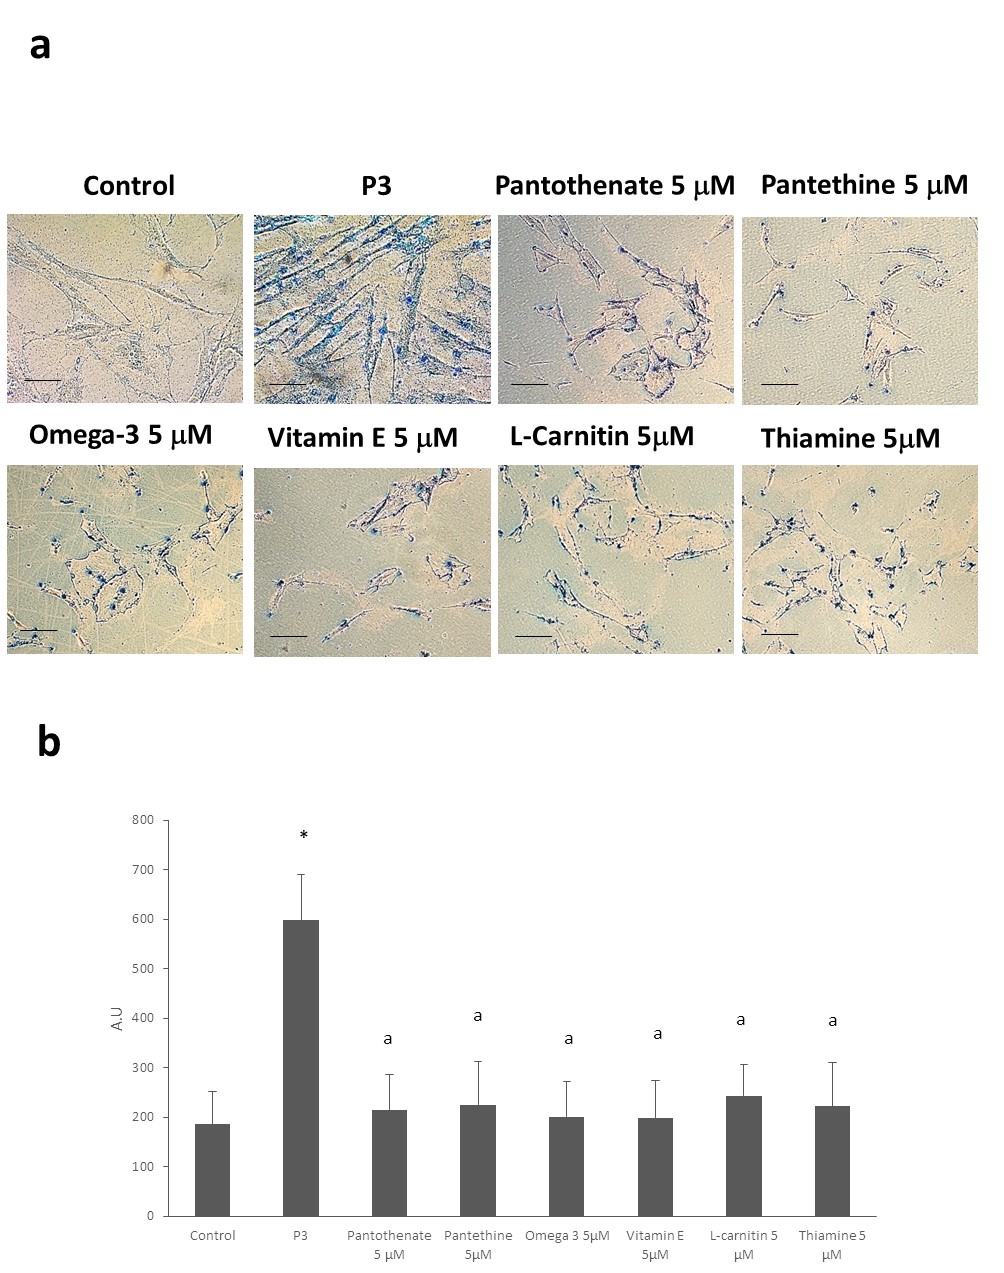
**

**Supplementary Figure 7.** (**a**) Control (C1) and PKAN fibroblasts (P3) were treated with pantothenate, pantethine, vitamin E, omega 3, L-carnitine or thiamine at 5 M for 20 days. Then, cells were stained with Prussian Blue as described in material and Methods and examined by bright-field microscopy. Scale bar= 15m. (**b**) Quantification of Prussian Blue staining. Images were analyzed by the Image J software. *p<0.01 between Control and PKAN fibroblasts. ap<0.01 between untreated and treated fibroblasts. A.U., arbitrary units.

**
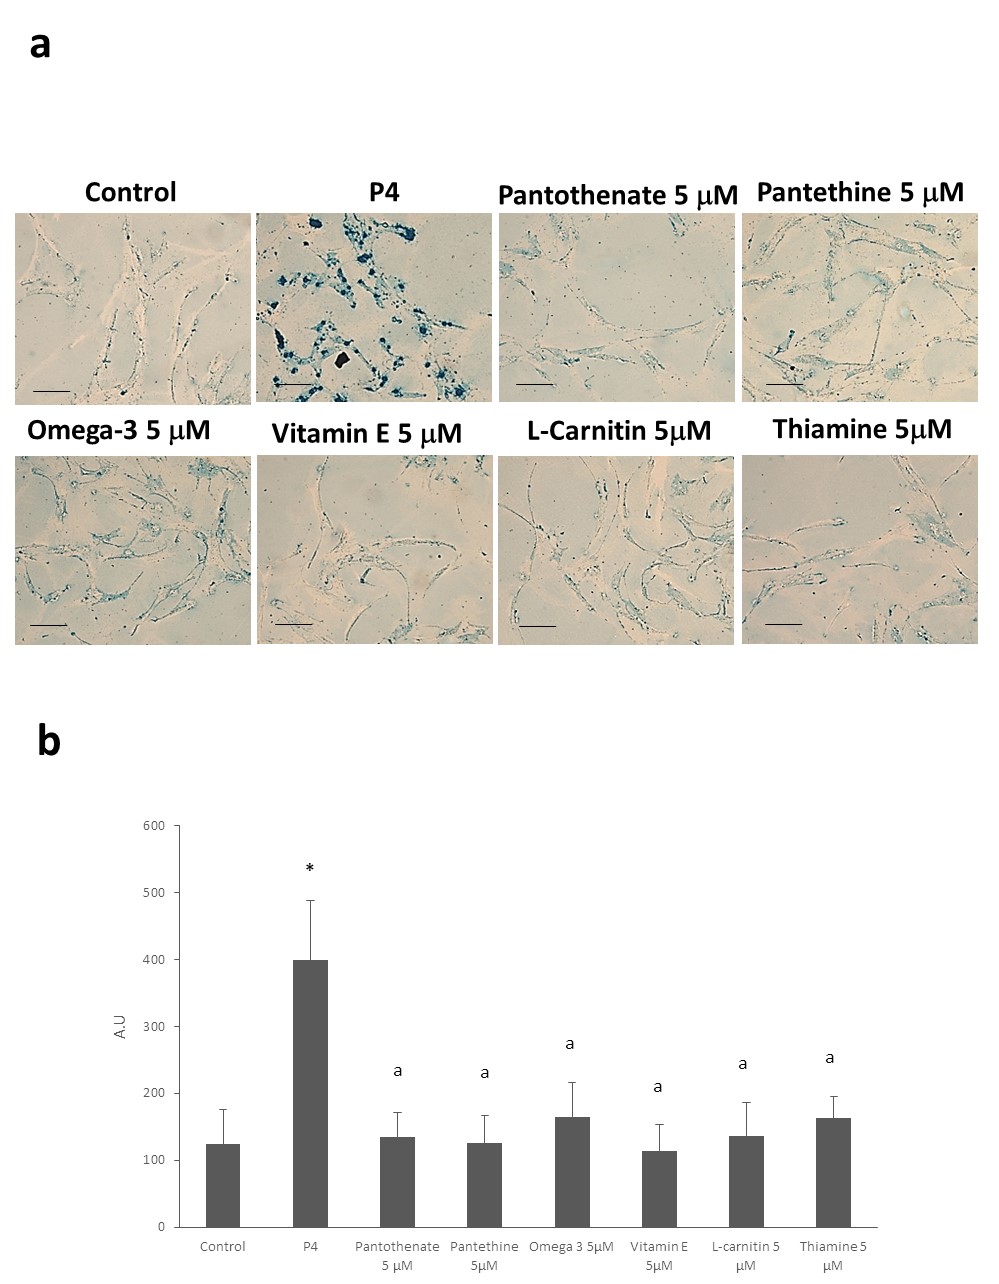
**

**Supplementary Figure 8.** (**a**) Control (C1) and PKAN fibroblasts (P4) were treated with pantothenate, pantethine, vitamin E, omega 3, L-carnitine or thiamine at 5 M for 20 days. Then, cells were stained with Prussian Blue as described in material and Methods and examined by bright-field microscopy. Scale bar= 15m. (**b**) Quantification of Prussian Blue staining. Images were analyzed by the Image J software. *p<0.01 between Control and PKAN fibroblasts. ap<0.01 between untreated and treated fibroblasts. A.U., arbitrary units.


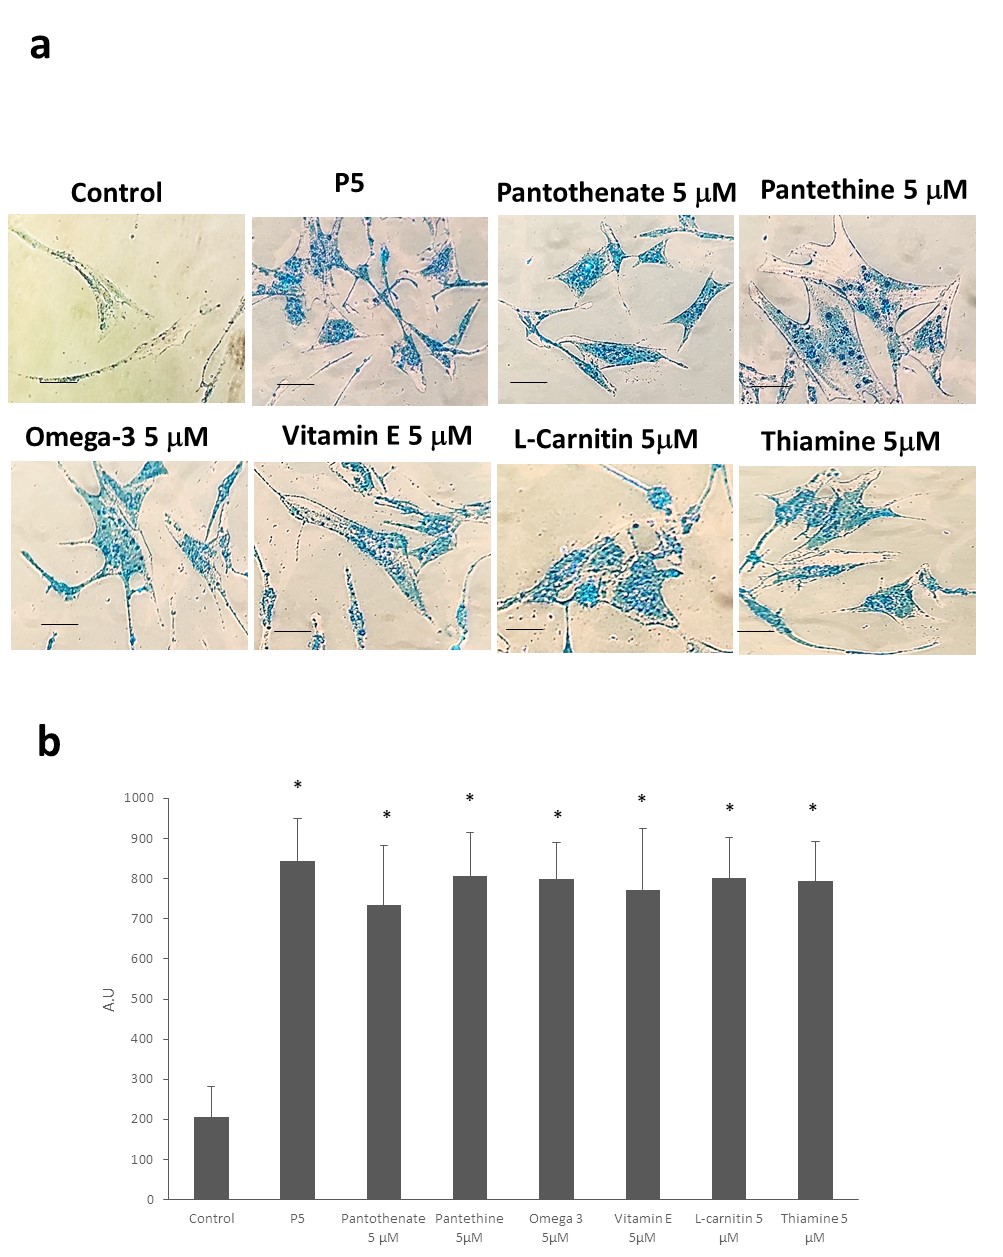


**Supplementary Figure 9.** (**a**) Control (C1) and PKAN fibroblasts (P5) were treated with pantothenate, pantethine, vitamin E, omega 3, L-carnitine or thiamine at 5 M for 20 days. Then, cells were stained with Prussian Blue as described in material and Methods and examined by bright-field microscopy. Scale bar= 15m. (**b**) Quantification of Prussian Blue staining. Images were analyzed by the Image J software. *p<0.01 between Control and PKAN fibroblasts. ap<0.01 between untreated and treated fibroblasts. A.U., arbitrary units.
